# Supplementary material for: CYNTENATOR: Progressive Gene Order Alignment of 17 Vertebrate Genomes
Source: PubMed Central journal article supplement (PMC2812507; doi:10.1371/journal.pone.0008861), 2010-01-28
Supplement: pone.0008861.s001.pdf [file pone.0008861.s001.pdf]

**A**

Duplication

Speciation

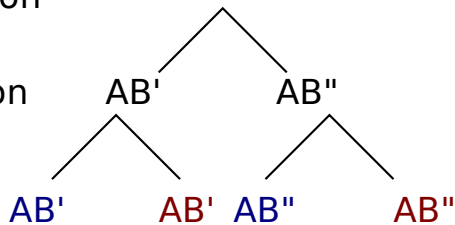**B**

Alignment Scores

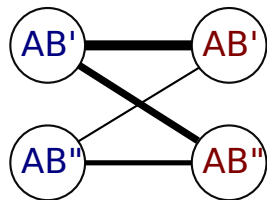**C**

Rank

Unique Alignment Filter

- 1  $AB'$  -  $AB'$   $\longrightarrow$  unique
- 2  $AB'$  -  $AB''$   $\longrightarrow$   $AB'$  seen before
- 3  $AB''$  -  $AB''$   $\longrightarrow$  unique
- 4  $AB''$  -  $AB'$   $\longrightarrow$   $AB''$  and  $AB'$  seen before
