# Supplementary material for: CYNTENATOR: Progressive Gene Order Alignment of 17 Vertebrate Genomes
Source: PubMed Central journal article supplement (PMC2812507; doi:10.1371/journal.pone.0008861), 2010-01-28

ratio of recovered collinear blocks

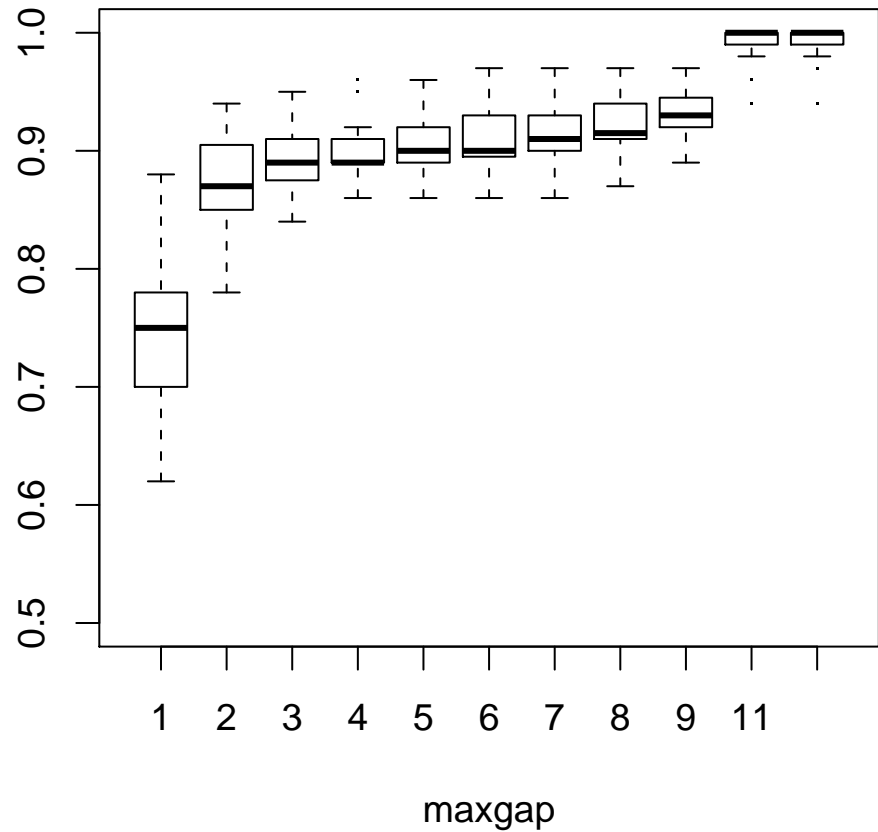

ratio of correctly called synteny

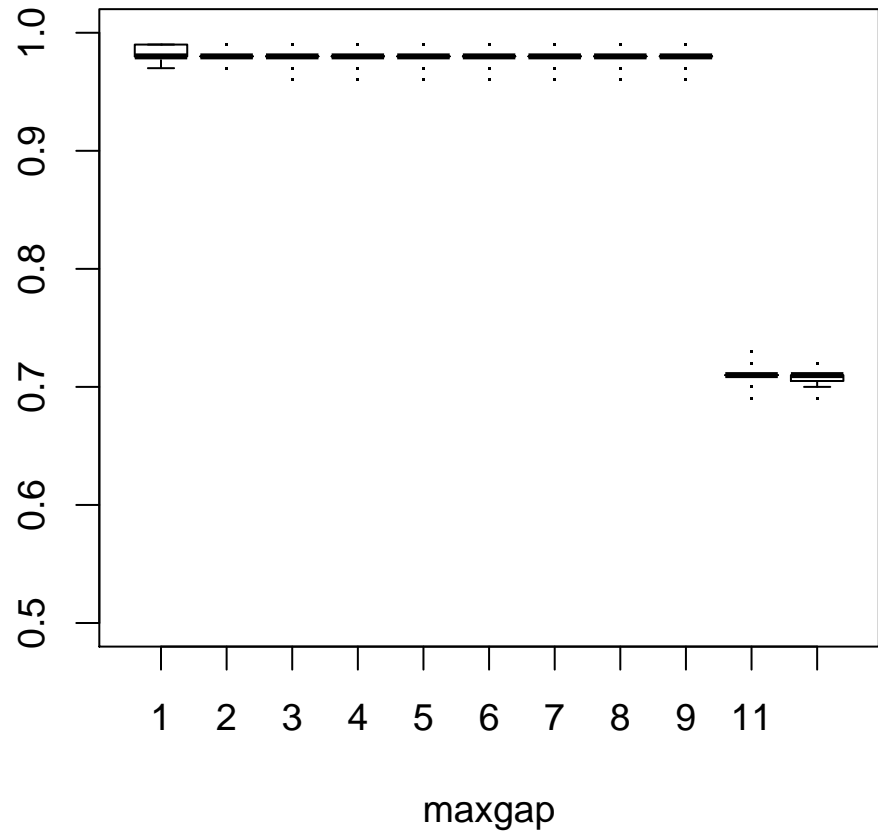

Supplement: pone.0008861.s007.pdf [file pone.0008861.s007.pdf]
