# Supplementary material for: CYNTENATOR: Progressive Gene Order Alignment of 17 Vertebrate Genomes
Source: PubMed Central journal article supplement (PMC2812507; doi:10.1371/journal.pone.0008861), 2010-01-28
Supplement: pone.0008861.s010.pdf [file pone.0008861.s010.pdf]

| <b>CSMs</b>        | <b><math>N_{P300}</math></b> | <b><math>N_{\text{expected}}</math></b> | <b><math>p</math>-value</b> |
|--------------------|------------------------------|-----------------------------------------|-----------------------------|
| rat                | 5083                         | 3207.8                                  | $< 10^{-3}$                 |
| primates-rodents   | 4852                         | 3958.8                                  | $< 10^{-3}$                 |
| eutherian mammals  | 4306                         | 3408.2                                  | $< 10^{-3}$                 |
| mammals            | 3926                         | 3134.9                                  | $< 10^{-3}$                 |
| including platypus | 2033                         | 1672.0                                  | $< 10^{-3}$                 |
| amniotes           | 1888                         | 1555.6                                  | $< 10^{-3}$                 |
| including frog     | 1223                         | 938.1                                   | $< 10^{-3}$                 |
| 17 vertebrates     | 308                          | 205.2                                   | $< 10^{-3}$                 |
