# Supplementary material for: CYNTENATOR: Progressive Gene Order Alignment of 17 Vertebrate Genomes
Source: PubMed Central journal article supplement (PMC2812507; doi:10.1371/journal.pone.0008861), 2010-01-28
Supplement: pone.0008861.s011.pdf [file pone.0008861.s011.pdf]

| <b>CSMs</b>        | <b><math>N_{H2H}</math></b> | <b><math>N_{Total}</math></b> | <b>Enrichment</b> | <b><i>p-value</i></b> |
|--------------------|-----------------------------|-------------------------------|-------------------|-----------------------|
| human chimp        | 1,017                       | 20,938                        | 0.99              | 1                     |
| primates           | 1,014                       | 20,639                        | 1.00              | 1                     |
| primates-rodents   | 904                         | 15,934                        | 1.15              | 0.02                  |
| eutherian mammals  | 821                         | 13,832                        | 1.20              | 0.0008                |
| including opossum  | 827                         | 13,987                        | 1.21              | 0.001                 |
| including platypus | 287                         | 5,471                         | 1.26              | 0.04                  |
| amniotes           | 296                         | 4,746                         | 1.27              | 0.005                 |
| including frog     | 166                         | 2,564                         | 1.31              | 0.02                  |
| 17 vertebrates     | 27                          | 405                           | 1.36              | 1                     |
