# Supplementary material for: CYNTENATOR: Progressive Gene Order Alignment of 17 Vertebrate Genomes
Source: PubMed Central journal article supplement (PMC2812507; doi:10.1371/journal.pone.0008861), 2010-01-28
Supplement: pone.0008861.s012.pdf [file pone.0008861.s012.pdf]

| Term       | p-value             | Description                                                                               |
|------------|---------------------|-------------------------------------------------------------------------------------------|
| GO:0042611 | < 10 <sup>-16</sup> | MHC protein complex                                                                       |
| GO:0019882 | < 10 <sup>-14</sup> | antigen processing and presentation                                                       |
| GO:0060089 | < 10 <sup>-13</sup> | molecular transducer activity                                                             |
| GO:0007606 | < 10 <sup>-12</sup> | sensory perception of chemical stimulus                                                   |
| GO:0007186 | < 10 <sup>-11</sup> | G-protein coupled receptor protein signaling pathway                                      |
| GO:0050896 | < 10 <sup>-11</sup> | response to stimulus                                                                      |
| GO:0004984 | < 10 <sup>-10</sup> | olfactory receptor activity                                                               |
| GO:0051059 | < 10 <sup>-9</sup>  | NF-kappaB binding                                                                         |
| GO:0003008 | < 10 <sup>-8</sup>  | system process                                                                            |
| GO:0051789 | < 10 <sup>-8</sup>  | response to protein stimulus                                                              |
| GO:0004872 | < 10 <sup>-7</sup>  | receptor activity                                                                         |
| GO:0007166 | < 10 <sup>-7</sup>  | cell surface receptor linked signal transduction                                          |
| GO:0032395 | < 10 <sup>-7</sup>  | MHC class II receptor activity                                                            |
| GO:0045111 | < 10 <sup>-6</sup>  | intermediate filament cytoskeleton                                                        |
| GO:0005886 | < 10 <sup>-6</sup>  | plasma membrane                                                                           |
| GO:0042824 | < 10 <sup>-5</sup>  | MHC class I peptide loading complex                                                       |
| GO:0050890 | < 10 <sup>-5</sup>  | cognition                                                                                 |
| GO:0004888 | < 10 <sup>-5</sup>  | transmembrane receptor activity                                                           |
| GO:0042287 | < 10 <sup>-5</sup>  | MHC protein binding                                                                       |
| GO:0002376 | < 10 <sup>-5</sup>  | immune system process                                                                     |
| GO:0050877 | 0.0002              | neurological system process                                                               |
| GO:0007154 | 0.0002              | cell communication                                                                        |
| GO:0006952 | 0.0002              | defense response                                                                          |
| GO:0044425 | 0.0004              | membrane part                                                                             |
| GO:0005634 | 0.0007              | nucleus                                                                                   |
| GO:0006323 | 0.0008              | DNA packaging                                                                             |
| GO:0050785 | 0.0008              | advanced glycation end-product receptor activity                                          |
| GO:0004930 | 0.0009              | G-protein coupled receptor activity                                                       |
| GO:0006955 | 0.0012              | immune response                                                                           |
| GO:0003708 | 0.0019              | retinoic acid receptor activity                                                           |
| GO:0016853 | 0.0021              | isomerase activity                                                                        |
| GO:0043933 | 0.0022              | macromolecular complex subunit organization                                               |
| GO:0031224 | 0.0023              | intrinsic to membrane                                                                     |
| GO:0002504 | 0.0023              | antigen processing and presentation of peptide or polysaccharide antigen via MHC class II |
| GO:0009991 | 0.0023              | response to extracellular stimulus                                                        |
| GO:0043087 | 0.0023              | regulation of GTPase activity                                                             |
| GO:0030545 | 0.0024              | receptor regulator activity                                                               |
| GO:0015197 | 0.0026              | peptide transporter activity                                                              |
| GO:0032196 | 0.0028              | transposition                                                                             |
| GO:0008134 | 0.0028              | transcription factor binding                                                              |
| GO:0032813 | 0.0030              | tumor necrosis factor receptor superfamily binding                                        |
| GO:0043565 | 0.0033              | sequence-specific DNA binding                                                             |
| GO:0042613 | 0.0034              | MHC class II protein complex                                                              |
| GO:0015665 | 0.0036              | alcohol transmembrane transporter activity                                                |
| GO:0007608 | 0.0036              | sensory perception of smell                                                               |
| GO:0046977 | 0.0038              | TAP binding                                                                               |
| GO:0003676 | 0.0043              | nucleic acid binding                                                                      |
| GO:0007600 | 0.0049              | sensory perception                                                                        |
| GO:0048871 | 0.0056              | multicellular organismal homeostasis                                                      |
| GO:0006414 | 0.0059              | translational elongation                                                                  |
| GO:0019865 | 0.0070              | immunoglobulin binding                                                                    |
| ...        |                     |                                                                                           |
