# Supplementary material for: CYNTENATOR: Progressive Gene Order Alignment of 17 Vertebrate Genomes
Source: PubMed Central journal article supplement (PMC2812507; doi:10.1371/journal.pone.0008861), 2010-01-28
Supplement: pone.0008861.s013.pdf [file pone.0008861.s013.pdf]

| <b>Term</b> | <b><i>p</i>-value</b> | <b>Description</b>                                   |
|-------------|-----------------------|------------------------------------------------------|
| GO:0004984  | $< 10^{-7}$           | olfactory receptor activity                          |
| GO:0007606  | $< 10^{-5}$           | sensory perception of chemical stimulus              |
| GO:0045111  | 0.0003                | intermediate filament cytoskeleton                   |
| GO:0010467  | 0.0005                | gene expression                                      |
| GO:0003676  | 0.0016                | nucleic acid binding                                 |
| GO:0007186  | 0.0193                | G-protein coupled receptor protein signaling pathway |
