# Supplementary material for: CYNTENATOR: Progressive Gene Order Alignment of 17 Vertebrate Genomes
Source: PubMed Central journal article supplement (PMC2812507; doi:10.1371/journal.pone.0008861), 2010-01-28
Supplement: pone.0008861.s014.pdf [file pone.0008861.s014.pdf]

| <b>Term</b> | <b>p-value</b>      | <b>Description</b>                                                    |
|-------------|---------------------|-----------------------------------------------------------------------|
| GO:0003676  | < 10 <sup>-30</sup> | nucleic acid binding                                                  |
| GO:0006139  | < 10 <sup>-23</sup> | nucleobase, nucleoside, nucleotide and nucleic acid metabolic process |
| GO:0043167  | < 10 <sup>-18</sup> | ion binding                                                           |
| GO:0010467  | < 10 <sup>-15</sup> | gene expression                                                       |
| GO:0009058  | < 10 <sup>-15</sup> | biosynthetic process                                                  |
| GO:0046914  | < 10 <sup>-12</sup> | transition metal ion binding                                          |
| GO:0019222  | < 10 <sup>-11</sup> | regulation of metabolic process                                       |
| GO:0003677  | < 10 <sup>-11</sup> | DNA binding                                                           |
| GO:0005634  | < 10 <sup>-9</sup>  | nucleus                                                               |
| GO:0008270  | < 10 <sup>-8</sup>  | zinc ion binding                                                      |
| GO:0016070  | < 10 <sup>-7</sup>  | RNA metabolic process                                                 |
| GO:0043169  | < 10 <sup>-6</sup>  | cation binding                                                        |
| GO:0065007  | < 10 <sup>-6</sup>  | biological regulation                                                 |
| GO:0007606  | < 10 <sup>-5</sup>  | GO:0007606 sensory perception of chemical stimulus                    |
| GO:0007186  | 0.0006              | G-protein coupled receptor protein signaling pathway                  |
| GO:0050890  | 0.0020              | cognition                                                             |
| GO:0004872  | 0.0041              | receptor activity                                                     |
| GO:0009410  | 0.0054              | response to xenobiotic stimulus                                       |
| GO:0006952  | 0.0168              | defense response                                                      |
| GO:0043170  | 0.0364              | macromolecule metabolic process                                       |
