# Supplementary material for: CYNTENATOR: Progressive Gene Order Alignment of 17 Vertebrate Genomes
Source: PubMed Central journal article supplement (PMC2812507; doi:10.1371/journal.pone.0008861), 2010-01-28
Supplement: pone.0008861.s015.pdf [file pone.0008861.s015.pdf]

| Repeat    | human | primate | rodents | eutherian<br>mammals | mammals | platypus | amniote | frog | all |
|-----------|-------|---------|---------|----------------------|---------|----------|---------|------|-----|
| (CA)n     |       |         |         |                      |         | ×        | ×       | ×    | ×   |
| (CAAT)n   | ×     |         |         |                      |         |          |         |      |     |
| (TC)n     | ×     |         |         |                      |         |          |         |      |     |
| (TCCCC)n  | ×     |         |         |                      |         |          |         |      |     |
| (TG)n     |       |         |         |                      |         | ×        |         |      |     |
| ALR/Alpha |       |         | ×       | ×                    | ×       |          |         |      |     |
| AluY      |       |         |         |                      |         | ×        |         |      |     |
| C-rich    |       |         |         | ×                    | ×       |          |         |      |     |
| ERVL-B4   |       |         |         | ×                    | ×       |          |         |      |     |
| HAL1b     |       |         |         |                      |         |          |         | ×    |     |
| HERVK     |       |         | ×       | ×                    |         |          |         |      |     |
| HERVL74   |       |         |         | ×                    | ×       |          |         |      |     |
| HERVS71   |       |         | ×       |                      |         |          |         |      |     |
| L1M1      |       |         |         | ×                    | ×       |          |         |      |     |
| L1M2      |       |         |         | ×                    | ×       |          |         |      |     |
| L1M3      |       |         |         | ×                    | ×       |          |         |      |     |
| L1M3c     |       |         |         | ×                    | ×       |          |         |      |     |
| L1M4      |       |         |         |                      | ×       |          |         |      |     |
| L1M4b     |       |         |         |                      | ×       |          |         |      |     |
| L1M4c     |       |         |         | ×                    | ×       |          |         |      |     |
| L1M5      |       |         |         |                      |         | ×        |         | ×    |     |
| L1MA6     |       |         |         | ×                    | ×       |          |         |      |     |
| L1MA7     |       |         |         |                      | ×       |          |         |      |     |
| L1MA8     |       |         |         |                      | ×       |          |         |      |     |
| L1MA9     |       |         |         | ×                    | ×       |          | ×       | ×    |     |
| L1MCa     |       |         |         |                      | ×       |          |         |      |     |
| L1MCb     |       |         |         | ×                    | ×       |          |         |      |     |
| L1MDb     |       |         |         | ×                    |         |          |         |      |     |
| L1ME1     |       |         |         |                      |         |          |         |      | ×   |
| L1ME2     |       |         |         |                      |         |          |         |      | ×   |
| L1ME3A    |       |         |         |                      |         |          |         |      | ×   |
| L1P4      |       |         |         | ×                    | ×       |          |         |      |     |
| L1PA10    |       |         |         | ×                    | ×       |          |         |      |     |
| L1PA13    |       |         |         | ×                    | ×       |          |         |      |     |
| L1PA15    |       |         |         |                      | ×       |          |         |      |     |
| L1PA16    |       |         |         |                      | ×       |          |         |      |     |
| L1PA4     |       |         |         |                      | ×       |          |         |      |     |
| L1PA8     |       |         |         | ×                    | ×       |          |         |      |     |
| L1PB3     |       |         |         |                      | ×       |          |         |      |     |
| L1PREC2   |       |         |         | ×                    |         |          |         |      |     |
| LOR1-int  |       |         |         | ×                    |         |          |         |      |     |
| LOR1a     |       |         |         |                      | ×       |          |         |      |     |
| LOR1b-int |       |         |         | ×                    |         |          |         |      |     |
| LTR2C     |       | ×       |         | ×                    | ×       |          |         |      |     |
| LTR35     |       | ×       | ×       |                      | ×       |          |         |      |     |
| LTR41     |       |         |         |                      |         | ×        |         |      |     |
| LTR5A     |       | ×       |         |                      |         |          |         |      |     |
| LTR60     | ×     | ×       | ×       |                      |         |          |         |      |     |
| MER112    |       |         |         |                      |         |          |         |      | ×   |
| MER41C    | ×     | ×       |         |                      |         |          |         |      |     |
| MER4A1    |       | ×       | ×       | ×                    | ×       |          |         |      |     |
| MER54A    |       |         | ×       |                      |         |          |         |      |     |
| MER65D    | ×     | ×       |         |                      |         |          |         |      |     |
| MER67C    |       |         |         |                      | ×       |          |         |      |     |
| MER89-int |       | ×       |         |                      |         |          |         |      |     |
| MIR       |       |         |         |                      |         |          |         | ×    | ×   |
| MIRb      |       |         |         |                      |         |          |         | ×    | ×   |
| MLT1A0    |       |         |         |                      |         | ×        |         |      | ×   |
| MLT1J     |       |         |         |                      |         |          |         |      | ×   |
| MLT1L     |       |         |         |                      |         |          |         |      | ×   |
| MLT2D     |       |         |         |                      |         |          | ×       |      |     |
| MSTA-int  |       |         |         | ×                    | ×       |          |         |      |     |
| REP522    |       | ×       | ×       |                      |         |          |         |      |     |
